# Supplementary material for: Silver(I) Complexes Based on Oxadiazole-Functionalized α-Aminophosphonate: Synthesis, Structural Study, and Biological Activities
Source: MDPI journal article supplement (doi:10.3390/molecules27238131), 2022-11-22
Supplement: s1 [file s1]

# **Silver(I) Complexes Based on Oxadiazole-Functionalized $\alpha$ -Aminophosphonate: Synthesis, Structural Study and Biological Activities**

Shaima Hkiri, Kübra Açıklın Coşkun, Elvan Üstün, Ali Samarat, Yusuf Tutar,  
Neslihan Şahin and David Sémeril

## **Contents**

|                                                         |     |
|---------------------------------------------------------|-----|
| FT-IR spectra of silver complexes <b>2</b> and <b>3</b> | p 2 |
| X-ray structure of complex <b>2</b>                     | p 3 |
| X-ray structure of complex <b>3</b>                     | p 6 |

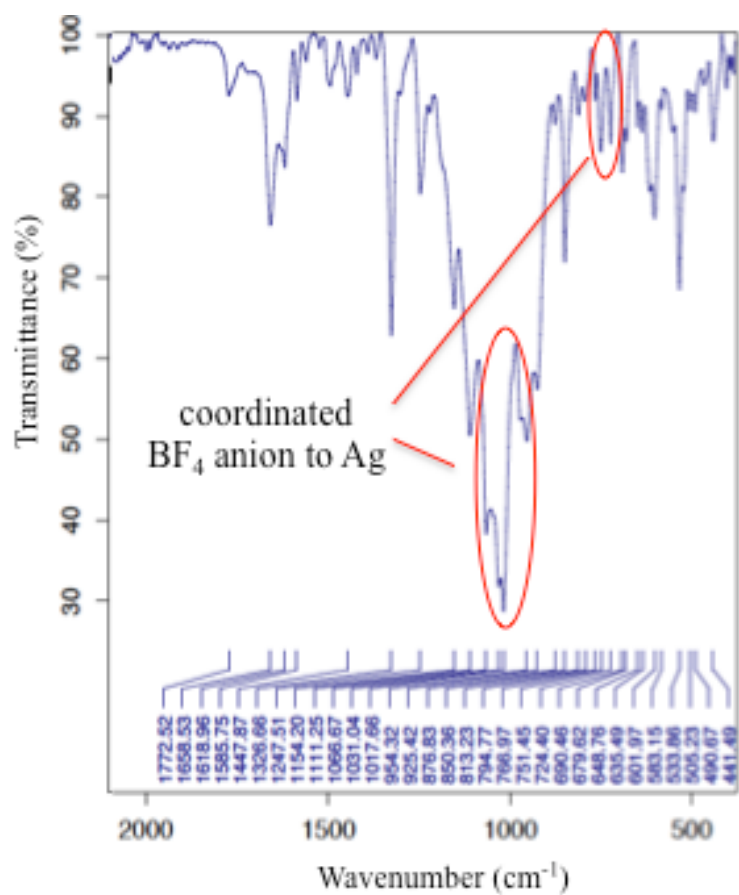

FT-IR spectrum of silver complex 2.

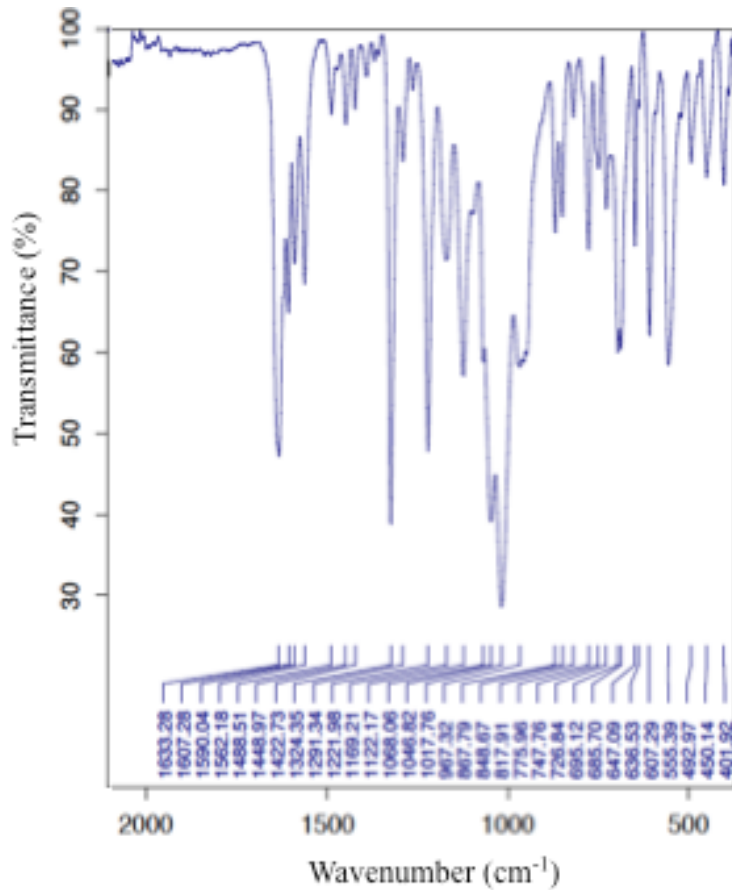

FT-IR spectrum of silver complex 3.

## X-ray structure of complex 2

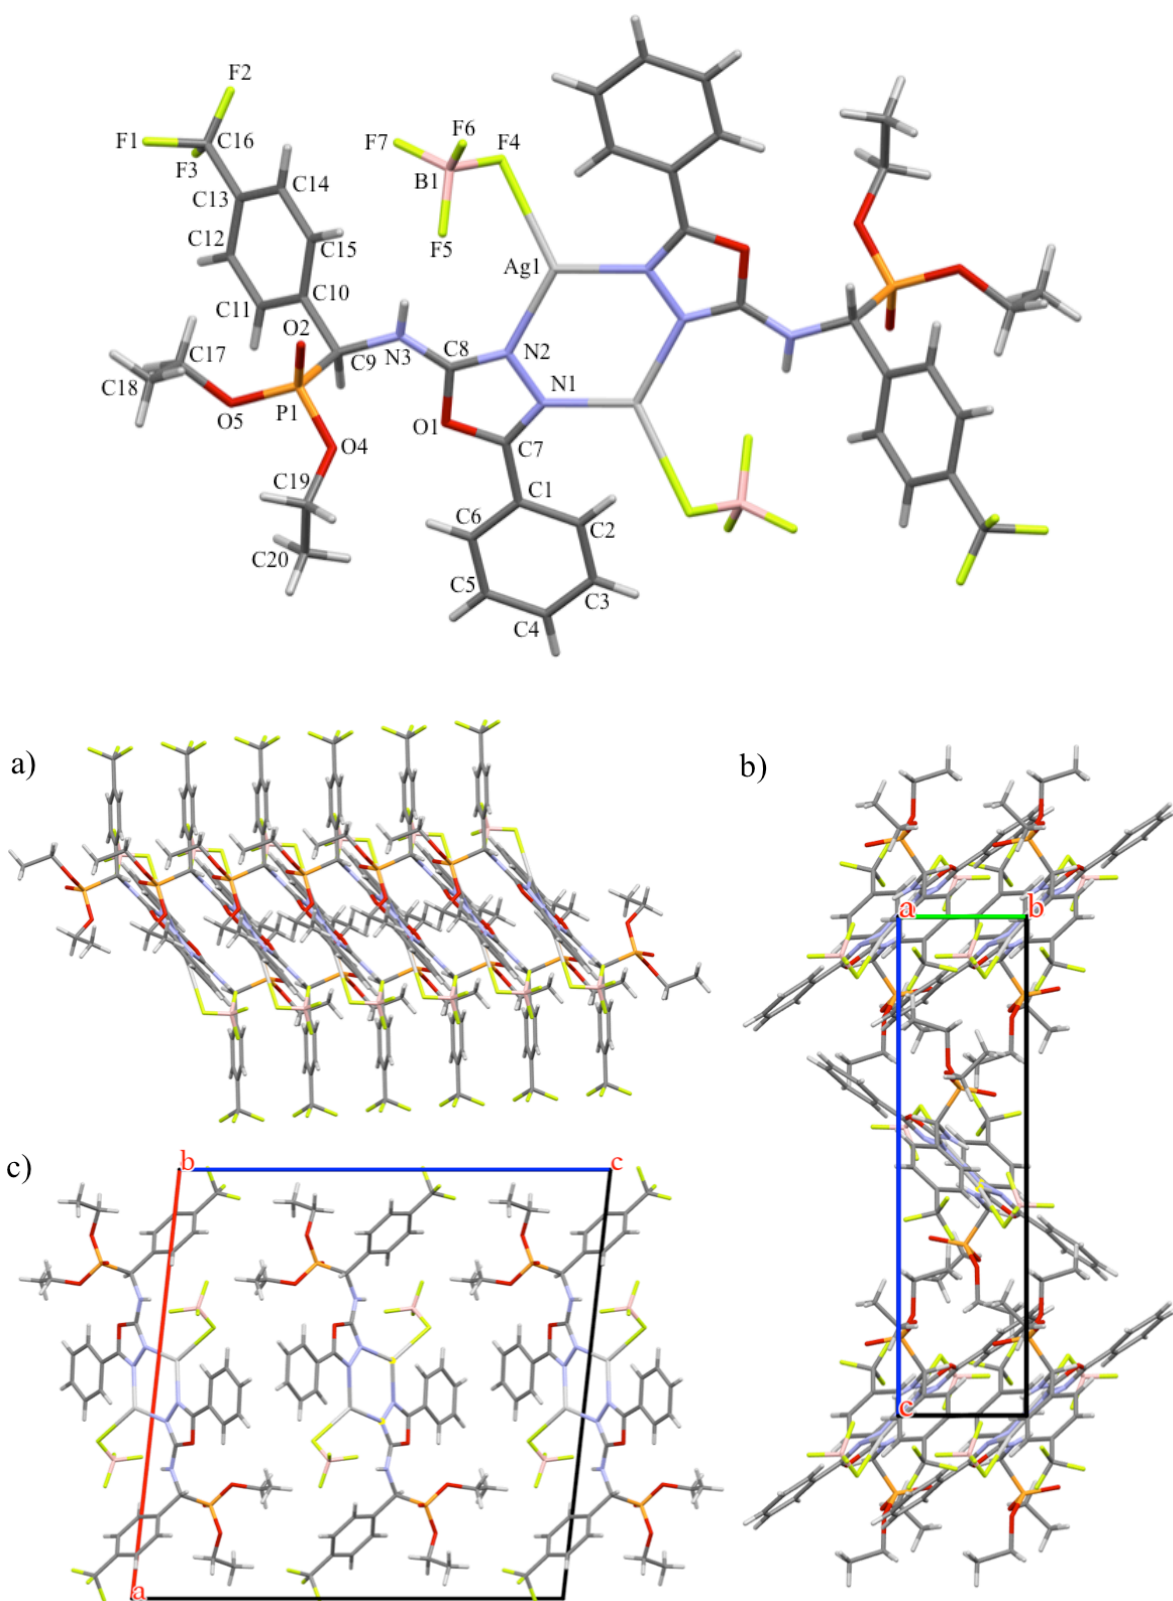

Figure S1. One-dimensional chain of **2** (a); three-dimensional network of **2**: along *a* axis (b) and along *b* axis (c) with  $a = 21.2741(8) \text{ \AA}$ ,  $b = 5.3745(2) \text{ \AA}$ ,  $c = 21.0826(9) \text{ \AA}$ .

| Lengths (Å)         |                    |                    |
|---------------------|--------------------|--------------------|
| C1 - C6 1.394(4)    | C6 - H6 0.9500     | C10 - C15 1.387(4) |
| C1 - C2 1.403(4)    | C7 - N1 1.293(4)   | C11 - C12 1.392(4) |
| C1 - C7 1.454(4)    | C7 - O1 1.372(3)   | C11 - H11 0.9500   |
| C2 - C3 1.387(4)    | C8 - N2 1.311(4)   | C12 - C13 1.381(5) |
| C2 - H2 0.9500      | C8 - N3 1.325(4)   | C12 - H12 0.9500   |
| C3 - C4 1.397(4)    | C8 - O1 1.353(3)   | C13 - C14 1.381(5) |
| C3 - H3 0.9500      | C9 - N3 1.463(3)   | C13 - C16 1.490(4) |
| C4 - C5 1.392(4)    | C9 - C10 1.522(4)  | C14 - C15 1.389(4) |
| C4 - H4 0.9500      | C9 - P1 1.827(3)   | C14 - H14 0.9500   |
| C5 - C6 1.385(4)    | C9 - H9 1.0000     | C15 - H15 0.9500   |
| C5 - H5 0.9500      | C10 - C11 1.386(4) | C16 - F2 1.270(7)  |
| C16 - F1B 1.357(9)  | C19 - O4 1.458(3)  | O2 - P1 1.465(2)   |
| C16 - F1 1.372(6)   | C19 - C20 1.501(5) | O3 - P1 1.572(2)   |
| C16 - F3 1.397(8)   | C19 - H19A 0.9900  | O4 - P1 1.562(2)   |
| C16 - F2B 1.409(10) | C19 - H19B 0.9900  | B1 - F7 1.368(4)   |
| C17 - O3 1.460(4)   | C20 - H20A 0.9800  | B1 - F6 1.383(4)   |
| C17 - C18 1.505(5)  | C20 - H20B 0.9800  | B1 - F4 1.402(4)   |
| C17 - H17A 0.9900   | C20 - H20C 0.9800  | B1 - F5 1.426(4)   |
| C17 - H17B 0.9900   | N1 - N2 1.406(3)   | F4 - Ag1 2.652(2)  |
| C18 - H18A 0.9800   | N1 - Ag1 2.260(2)  | Ag1 - N2 2.215(2)  |
| C18 - H18B 0.9800   | N2 - Ag1 2.215(2)  |                    |
| C18 - H18C 0.980    | N3 - H3N 0.85(4)   |                    |

| Angles (°)            |                          |                         |
|-----------------------|--------------------------|-------------------------|
| C6 - C1 - C2 119.8(3) | C13 - C12 - H12 120.1    | C20 - C19 - H19A 110.0  |
| C6 - C1 - C7 121.0(2) | C11 - C12 - H12 120.1    | O4 - C19 - H19B 110.0   |
| C2 - C1 - C7 119.1(2) | C12 - C13 - C14 120.7(3) | C20 - C19 - H19B 110.0  |
| C3 - C2 - C1 120.1(3) | C12 - C13 - C16 120.1(3) | H19A - C19 - H19B 108.4 |
| C3 - C2 - H2 119.9    | C14 - C13 - C16 119.3(3) | C19 - C20 - H20A 109.5  |
| C1 - C2 - H2 119.9    | C13 - C14 - C15 119.4(3) | C19 - C20 - H20B 109.5  |
| C2 - C3 - C4 119.8(3) | C13 - C14 - H14 120.3    | H20A - C20 - H20B 109.5 |
| C2 - C3 - H3 120.1    | C15 - C14 - H14 120.3    | C19 - C20 - H20C 109.5  |

|                          |                          |                          |
|--------------------------|--------------------------|--------------------------|
| C4 - C3 - H3 120.1       | C10 - C15 - C14 120.5(3) | H20A - C20 - H20C 109.5  |
| C5 - C4 - C3 120.0(3)    | C10 - C15 - H15 119.7    | H20B - C20 - H20C 109.5  |
| C5 - C4 - H4 120.0       | C14 - C15 - H15 119.7    | C7 - N1 - N2 107.4(2)    |
| C3 - C4 - H4 120.0       | F3B - C16 - F1B 107.6(5) | C7 - N1 - Ag1 137.61(19) |
| C6 - C5 - C4 120.5(3)    | F2 - C16 - F1 107.8(4)   | N2 - N1 - Ag1 110.24(16) |
| C6 - C5 - H5 119.7       | F2 - C16 - F3 108.8(5)   | C8 - N2 - N1 105.4(2)    |
| C4 - C5 - H5 119.7       | F1 - C16 - F3 99.3(4)    | C8 - N2 - Ag1 134.80(19) |
| C5 - C6 - C1 119.8(3)    | F3B - C16 - F2B 102.9(6) | N1 - N2 - Ag1 119.32(16) |
| C5 - C6 - H6 120.1       | F1B - C16 - F2B 102.2(6) | C8 - N3 - C9 124.4(2)    |
| C1 - C6 - H6 120.1       | F2 - C16 - C13 117.8(4)  | C8 - N3 - H3N 117(2)     |
| N1 - C7 - O1 111.3(2)    | F3B - C16 - C13 120.7(5) | C9 - N3 - H3N 119(2)     |
| N1 - C7 - C1 129.7(2)    | F1B - C16 - C13 112.6(4) | C8 - O1 - C7 103.6(2)    |
| O1 - C7 - C1 119.0(2)    | F1 - C16 - C13 111.6(3)  | C17 - O3 - P1 121.0(2)   |
| N2 - C8 - N3 127.5(3)    | F3 - C16 - C13 109.9(4)  | C19 - O4 - P1 125.18(19) |
| N2 - C8 - O1 112.3(2)    | F2B - C16 - C13 108.8(4) | F7 - B1 - F6 111.8(3)    |
| N3 - C8 - O1 120.1(2)    | O3 - C17 - C18 110.9(3)  | F7 - B1 - F4 111.5(3)    |
| N3 - C9 - C10 111.2(2)   | O3 - C17 - H17A 109.5    | F6 - B1 - F4 108.6(3)    |
| N3 - C9 - P1 107.04(19)  | C18 - C17 - H17A 109.5   | F7 - B1 - F5 110.2(3)    |
| C10 - C9 - P1 111.68(19) | O3 - C17 - H17B 109.5    | F6 - B1 - F5 108.1(3)    |
| N3 - C9 - H9 108.9       | C18 - C17 - H17B 109.5   | F4 - B1 - F5 106.4(3)    |
| C10 - C9 - H9 108.9      | H17A - C17 - H17B 108.1  | O2 - P1 - O4 116.85(14)  |
| P1 - C9 - H9 108.9       | C17 - C18 - H18A 109.5   | O2 - P1 - O3 115.03(13)  |
| C11 - C10 - C15 119.5(3) | C17 - C18 - H18B 109.5   | O4 - P1 - O3 104.07(12)  |
| C11 - C10 - C9 118.8(3)  | H18A - C18 - H18B 109.5  | O2 - P1 - C9 112.42(13)  |
| C15 - C10 - C9 121.6(3)  | C17 - C18 - H18C 109.5   | O4 - P1 - C9 100.16(12)  |
| C10 - C11 - C12 120.1(3) | H18A - C18 - H18C 109.5  | O3 - P1 - C9 106.78(12)  |
| C10 - C11 - H11 120.0    | H18B - C18 - H18C 109.5  | N2 - Ag1 - N1 123.75(8)  |
| C12 - C11 - H11 120.0    | O4 - C19 - C20 108.5(3)  | N2 - Ag1 - F4 123.02(7)  |
| C13 - C12 - C11 119.7(3) | O4 - C19 - H19A 110.0    | N1 - Ag1 - F4 112.85(8)  |

## X-ray structure of complex **3**

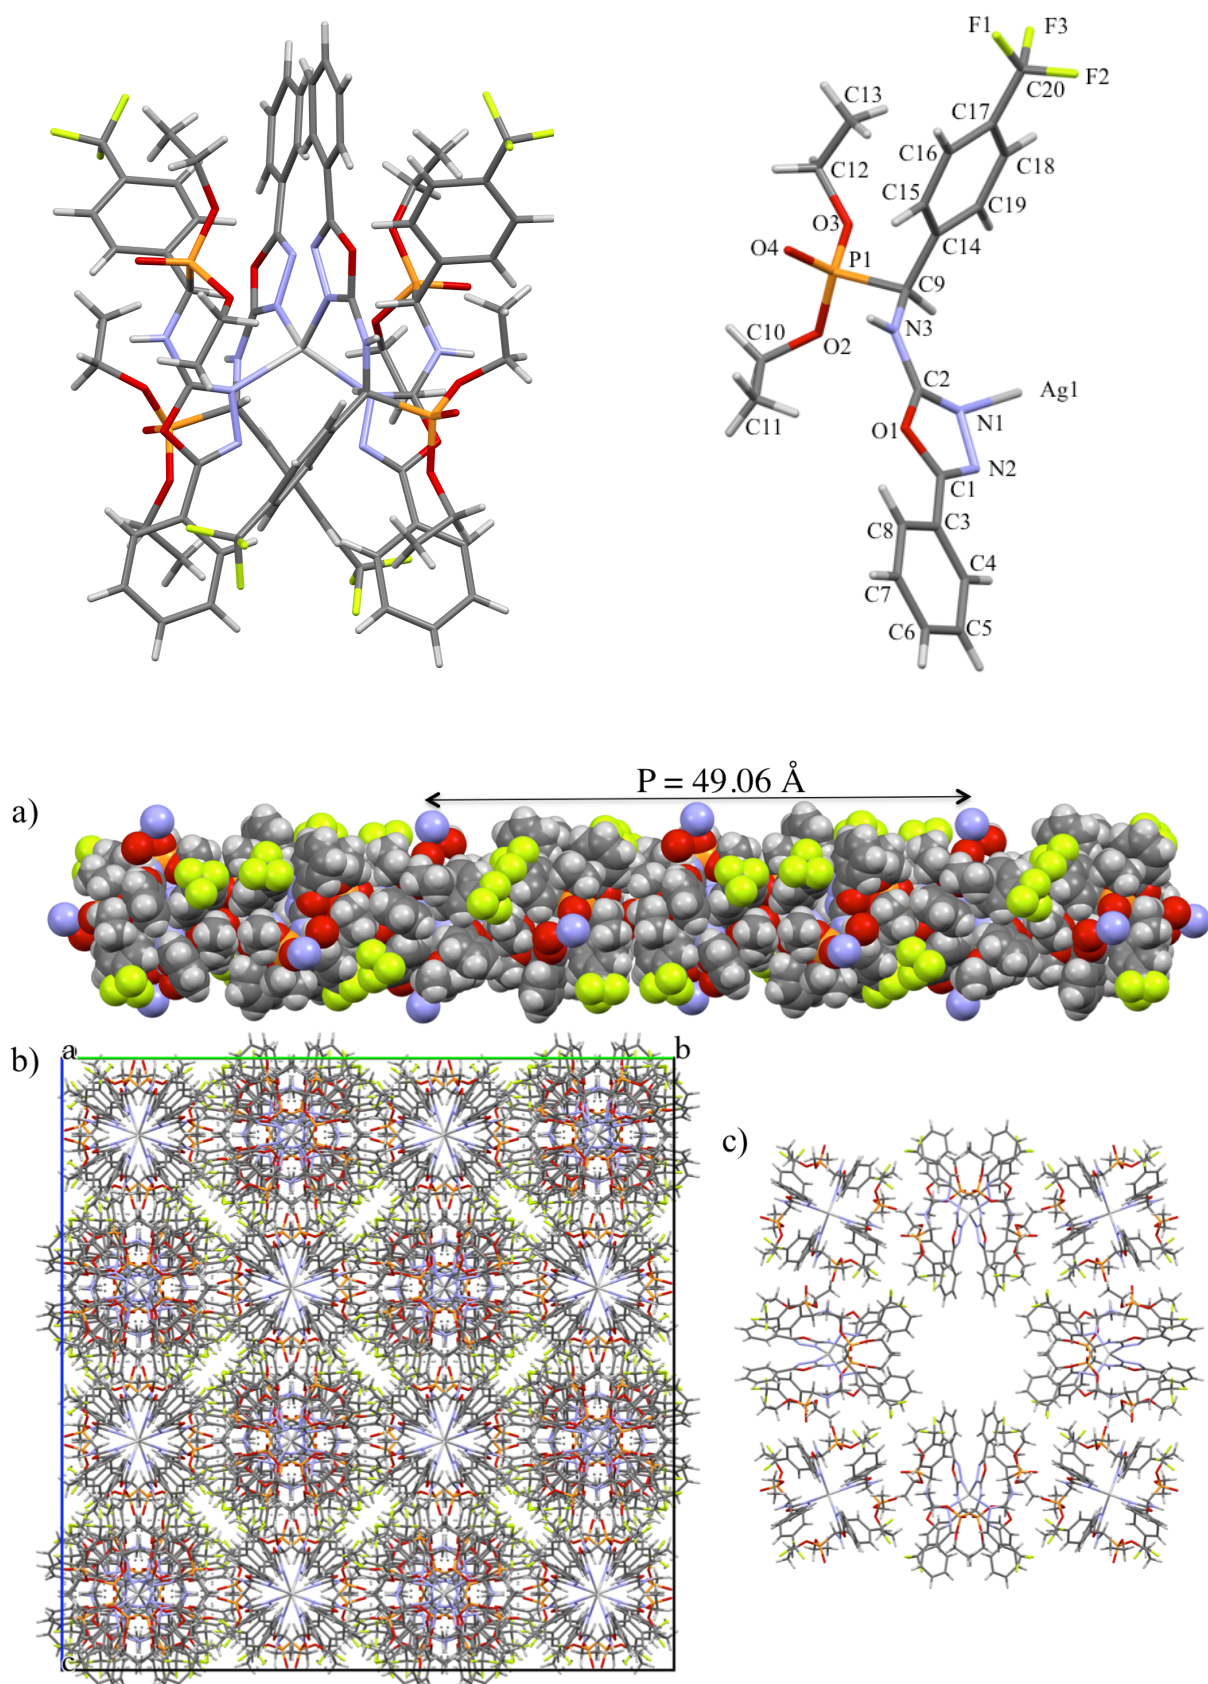

Figure S2. Helical chain observed into **3** complex (a); three-dimensional network of **3** along a axis (b) with a zoom (c);  $a = b = c = 49.0604(6) \text{ \AA}$ .

| Lengths (Å)       |                     |                     |
|-------------------|---------------------|---------------------|
| Ag1 - N1 2.294(5) | C7 - C8 1.3900      | C13 - H13C 0.9804   |
| Ag1 - N1 2.294(5) | C7 - H7 0.9500      | C14 - C15 1.3900    |
| Ag1 - N1 2.294(5) | C8 - H8 0.9500      | C14 - C19 1.3900    |
| Ag1 - N1 2.294(5) | N3 - C9 1.460(9)    | C15 - C16 1.3900    |
| N1 - C2 1.279(9)  | N3 - H3 0.8800      | C15 - H15 0.9500    |
| N1 - N2 1.410(7)  | C9 - C14 1.488(9)   | C16 - C17 1.3900    |
| N2 - C1 1.236(10) | C9 - P1 1.832(8)    | C16 - H16 0.9500    |
| C1 - O1 1.353(11) | P1 - O4 1.472(5)    | C17 - C20 1.345(13) |
| C1 - C3 1.478(10) | P1 - O2 1.565(6)    | C17 - C18 1.3900    |
| O1 - C2 1.368(8)  | P1 - O3 1.570(6)    | C18 - C19 1.3900    |
| C2 - N3 1.319(10) | O2 - C10 1.485(11)  | C18 - H18 0.9500    |
| C3 - C4 1.3900    | O2 - C10A 1.484(14) | C19 - H19 0.9500    |
| C3 - C8 1.3900    | C10 - C11 1.502(15) | C20 - F2 1.354(15)  |
| C4 - C5 1.3900    | O3 - C12 1.492(13)  | C20 - F3A 1.389(17) |
| C4 - H4 0.9500    | C12 - C13 1.457(14) | C20 - F1A 1.404(16) |
| C5 - C6 1.3900    | C12 - H12A 0.9900   | C20 - F3 1.415(15)  |
| C5 - H5 0.9500    | C12 - H12B 0.9900   | C20 - F2A 1.444(16) |
| C6 - C7 1.3900    | C13 - H13A 0.9804   | C20 - F1 1.440(15)  |
| C6 - H6 0.9500    | C13 - H13B 0.9804   |                     |

| Angles (°)               |                          |                         |
|--------------------------|--------------------------|-------------------------|
| N1 - Ag1 - N1 105.50(12) | N1 - Ag1 - N1 105.50(12) | C2 - N1 - N2 105.6(6)   |
| N1 - Ag1 - N1 117.8(3)   | N1 - Ag1 - N1 117.8(3)   | C2 - N1 - Ag1 140.2(5)  |
| N1 - Ag1 - N1 105.50(12) | N1 - Ag1 - N1 105.49(12) | N2 - N1 - Ag1 113.9(4)  |
| C1 - N2 - N1 107.6(7)    | O2 - P1 - C9 101.1(3)    | C12 - C13 - H13B 109.8  |
| N2 - C1 - O1 112.7(7)    | O3 - P1 - C9 104.8(3)    | H13A - C13 - H13B 109.4 |
| N2 - C1 - C3 125.4(10)   | C10 - O2 - P1 119.6(9)   | C12 - C13 - H13C 109.1  |
| O1 - C1 - C3 121.8(8)    | C10A - O2 - P1 124.3(13) | H13A - C13 - H13C 109.4 |
| C1 - O1 - C2 102.9(6)    | O2 - C10 - C11 112.1(11) | H13B - C13 - H13C 109.5 |
| N1 - C2 - N3 131.9(7)    | O2 - C10 - H10A 109.2    | C15 - C14 - C19 120.0   |
| N1 - C2 - O1 111.2(7)    | C11 - C10 - H10A 108.4   | C15 - C14 - C9 121.3(4) |
| N3 - C2 - O1 116.9(6)    | O2 - C10 - H10B 109.7    | C19 - C14 - C9 118.6(4) |

|                        |                            |                           |
|------------------------|----------------------------|---------------------------|
| C4 - C3 - C8 120.0     | C11 - C10 - H10B 109.5     | C14 - C15 - C16 120.0     |
| C4 - C3 - C1 120.6(8)  | H10A - C10 - H10B 107.9    | C14 - C15 - H15 120.0     |
| C8 - C3 - C1 119.4(8)  | C10 - C11 - H11A 109.9     | C16 - C15 - H15 120.0     |
| C5 - C4 - C3 120.0     | C10 - C11 - H11B 110.0     | C15 - C16 - C17 120.0     |
| C5 - C4 - H4 120.0     | H11A - C11 - H11B 109.4    | C15 - C16 - H16 120.0     |
| C3 - C4 - H4 120.0     | C10 - C11 - H11C 108.8     | C17 - C16 - H16 120.0     |
| C4 - C5 - C6 120.0     | H11A - C11 - H11C 109.4    | C20 - C17 - C18 119.3(7)  |
| C4 - C5 - H5 120.0     | H11B - C11 - H11C 109.3    | C20 - C17 - C16 120.7(7)  |
| C6 - C5 - H5 120.0     | O2 - C10A - C11A 112.5(14) | C18 - C17 - C16 120.0     |
| C7 - C6 - C5 120.0     | O2 - C10A - H10C 108.4     | C17 - C18 - C19 120.0     |
| C7 - C6 - H6 120.0     | C11A - C10A - H10C 107.9   | C17 - C18 - H18 120.0     |
| C5 - C6 - H6 120.0     | O2 - C10A - H10D 109.6     | C19 - C18 - H18 120.0     |
| C8 - C7 - C6 120.0     | C11A - C10A - H10D 110.5   | C18 - C19 - C14 120.0     |
| C8 - C7 - H7 120.0     | H10C - C10A - H10D 107.8   | C18 - C19 - H19 120.0     |
| C6 - C7 - H7 120.0     | C10A - C11A - H11D 112.9   | C14 - C19 - H19 120.0     |
| C7 - C8 - C3 120.0     | C10A - C11A - H11E 110.7   | F2 - C20 - C17 128.6(14)  |
| C7 - C8 - H8 120.0     | H11D - C11A - H11E 107.8   | C17 - C20 - F3A 140(2)    |
| C3 - C8 - H8 120.0     | C10A - C11A - H11F 110.4   | C17 - C20 - F1A 116.1(17) |
| C2 - N3 - C9 122.5(6)  | H11D - C11A - H11F 107.1   | F3A - C20 - F1A 96.7(13)  |
| C2 - N3 - H3 118.9     | H11E - C11A - H11F 107.7   | F2 - C20 - F3 95.9(13)    |
| C9 - N3 - H3 118.5     | C12 - O3 - P1 125.5(5)     | C17 - C20 - F3 121.0(12)  |
| N3 - C9 - C14 113.9(6) | C13 - C12 - O3 109.3(11)   | C17 C20 F2A 110.1(14)     |
| N3 - C9 - P1 107.0(5)  | C13 - C12 - H12A 109.9     | F3A - C20 - F2A 91.3(12)  |
| C14 - C9 - P1 109.6(5) | O3 - C12 - H12A 110.2      | F1A - C20 - F2A 90.5(12)  |
| O4 - P1 - O2 116.3(4)  | C13 - C12 - H12B 109.4     | F2 - C20 - F1 94.5(13)    |
| O4 - P1 - O3 113.3(3)  | O3 - C12 - H12B 109.9      | C17 - C20 - F1 116.3(12)  |
| O2 - P1 - O3 106.2(3)  | H12A - C12 - H12B 108.2    | F3 - C20 - F1 92.0(11)    |
| O4 - P1 - C9 113.9(3)  | C12 - C13 - H13A 109.7     |                           |

---
